# Supplementary material
Source: PubMed Central journal article supplement (PMC4845894)
Supplement: NIHMS773899-supplement-supplemental.pdf [file NIHMS773899-supplement-supplemental.pdf]

## Supplementary Online Content

Yaghi S, Boehme AK, Dibu J, et al. Treatment and outcome of thrombolysis-related hemorrhage: a multicenter retrospective study. Published online October 26, 2015. *JAMA Neurol*. doi:10.1001/jamaneurol.2015.2371.

**eTable.** Comparisons Between Those With and Without Follow-up Examinations

This supplementary material has been provided by the authors to give readers additional information about their work.

© 2015 American Medical Association. All rights reserved.

**eTable.** Comparisons Between Those With and Without Follow-up Examinations

|                                                           | Without Follow up exam (N=46) | With Follow up exam (N=82) | p-value |
|-----------------------------------------------------------|-------------------------------|----------------------------|---------|
| Age in years (median, range)                              | 76 (42-99)                    | 73 (23-94)                 | 0.0917  |
| Gender (% male)                                           | 56.5%                         | 45.1%                      | 0.2158  |
| <b><i>Ethnicity</i></b>                                   |                               |                            | 0.9502  |
| Caucasian                                                 | 63%                           | 63.4%                      |         |
| African American                                          | 30.4%                         | 29.3%                      |         |
| Hispanic                                                  | 4.4%                          | 6.1%                       |         |
| Other                                                     | 2.2%                          | 1.2%                       |         |
| NIHSS (median)                                            | 15 (0-33)                     | 14 (1-32)                  | 0.6836  |
| Neuro-Interventional Procedure                            | 13%                           | 14.6%                      | 0.8038  |
| Hematoma Volume in cc (median, range)                     | 23 (1-245)                    | 25 (1-175)                 | 0.5251  |
| Time from rtPA to sICH diagnosis in hours (median, range) | 442 (59-1980)                 | 486 (30-2572)              | 0.3101  |
| Time to treatment of sICH in hours (median, range)        | 83 (29-628)                   | 112 (12-419)               | 0.5363  |
| <b><i>Type of treatment</i></b>                           |                               |                            |         |
| Any treatment                                             | 30%                           | 52%                        | 0.0404  |
| Fresh Frozen Plasma                                       | 19.6%                         | 20.7%                      | 0.8749  |
| Vitamin K                                                 | 4.4%                          | 3.9%                       | 0.2988  |
| Cryoprecipitate                                           | 28.3%                         | 32.9%                      | 0.3665  |
| Platelets                                                 | 28.3%                         | 29.3%                      | 0.1601  |

© 2015 American Medical Association. All rights reserved.

|                                      |       |       |        |
|--------------------------------------|-------|-------|--------|
| Amicar                               | 0     | 3.7%  | 0.2594 |
| Prothrombin Complex Concentrate      | 0     | 3.7%  | 0.2594 |
| Factor VIIa                          | 0     | 3.7%  | 0.2594 |
| Surgical treatment                   | 19.5% | 12.2% | 0.2791 |
| Code Status Change in first 24 hours | 43.5% | 20.7% | 0.0065 |
| Mortality                            | 69.6% | 42.7% | 0.0035 |

© 2015 American Medical Association. All rights reserved.
